# Supplementary material for: Consistency of non-cognitive skills and their relation to educational outcomes in a UK cohort
Source: bioRxiv or medRxiv preprint supplement (doi:10.1101/470682), 2021-02-01

Supplementary Figure 1: Associations between skills and educational attainment

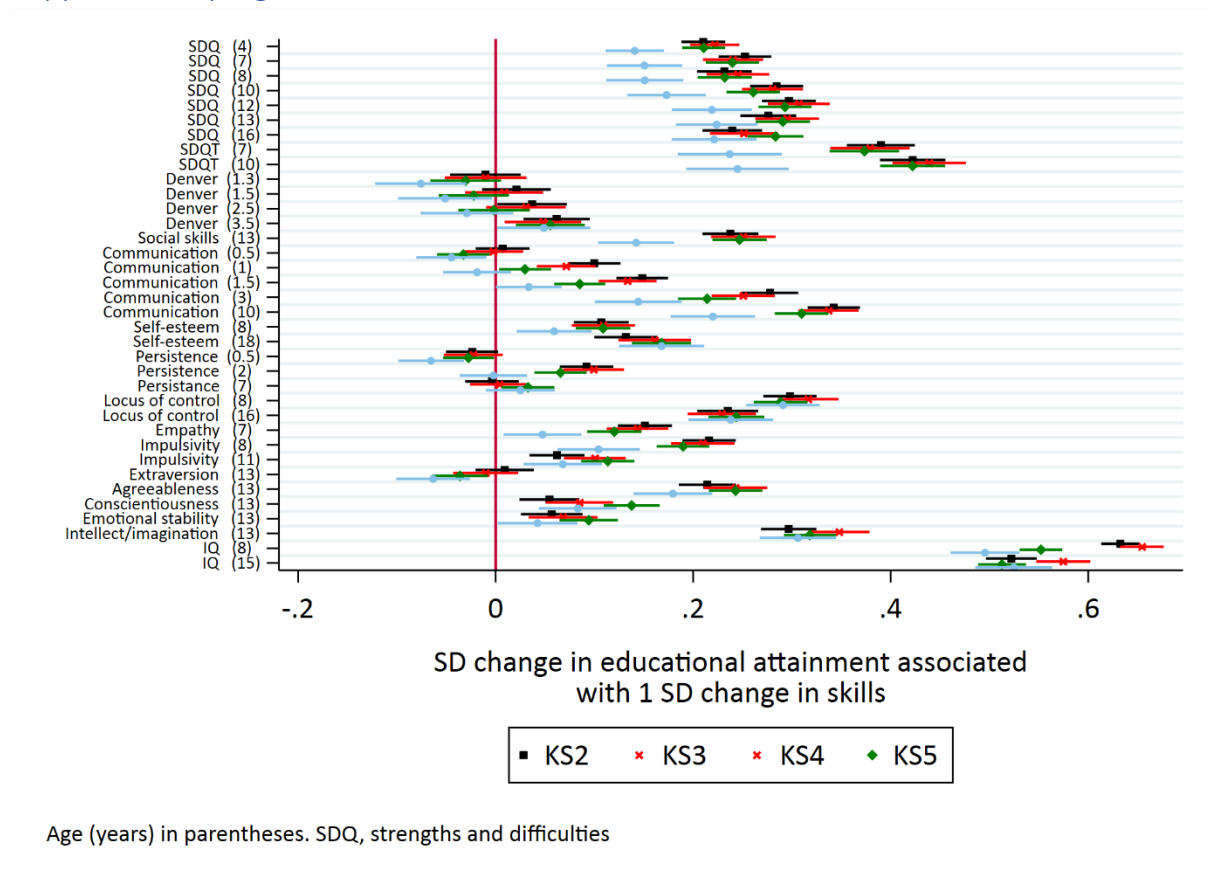

Supplementary Figure 2: Heritability of SDQ total scores and SDQ internalising/externalising subscales

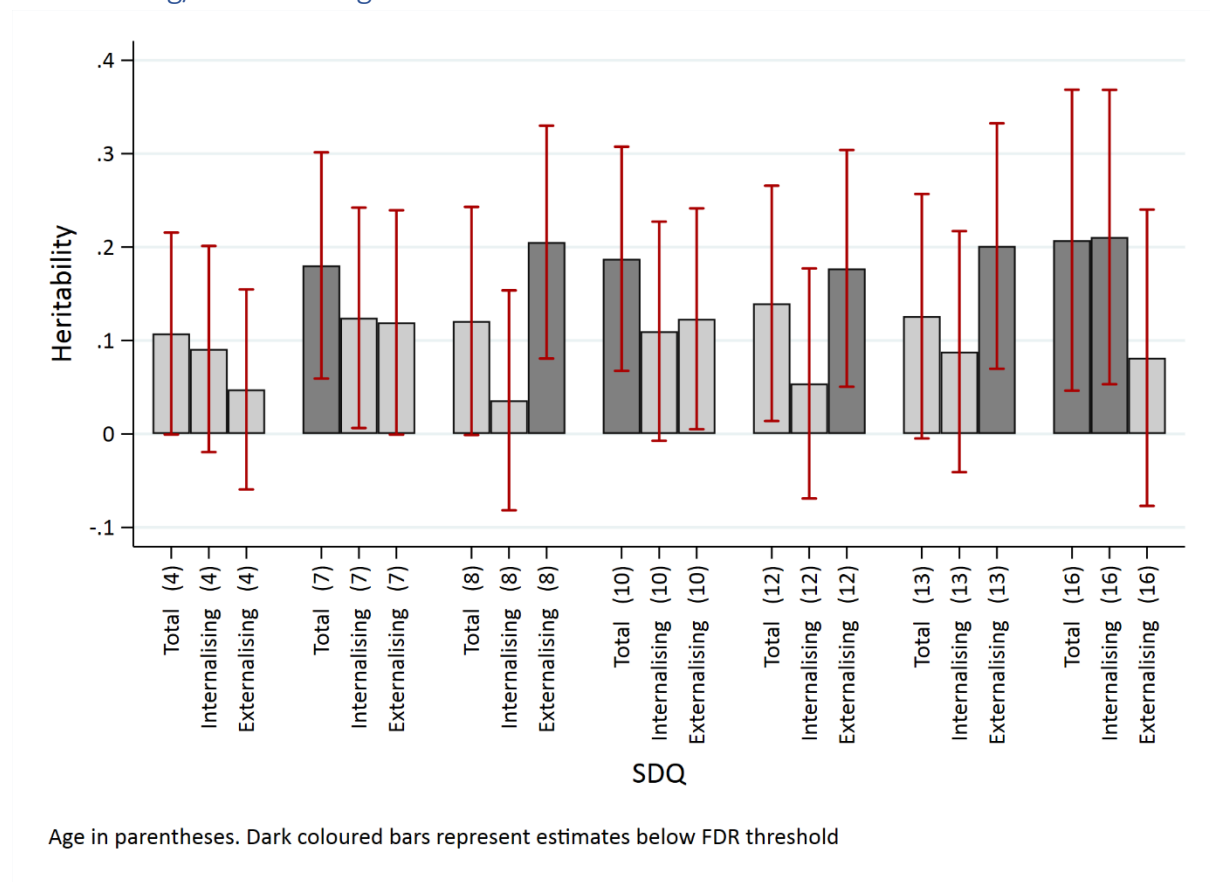

Supplement: Supplementary file [file 470682-1.pdf]
